# Supplementary material for: Application of Plasma Activation in Flame-Retardant Treatment for Cotton Fabric
Source: MDPI journal article supplement (doi:10.3390/polym12071575), 2020-07-16
Supplement: s1 [file s1]

Article

# Application of Plasma Activation in Flame-Retardant Treatment for Cotton Fabric

Huong Nguyen Thi <sup>1,2</sup>, Khanh Vu Thi Hong <sup>1,\*</sup>, Thanh Ngo Ha <sup>1</sup> and Duy-Nam Phan <sup>1</sup>

<sup>1</sup> School of Textile – Leather and Fashion (STLF) - Hanoi University of Science and Technology (HUST), No. 1, Dai Co Viet, Hai Ba Trung, Hanoi, 100803, Viet Nam; huongnt87@hict.edu.vn (N.T.H); thanh.ngoha@hust.edu.vn (N.H.T); nam.phanduy@hust.edu.vn (P.D.N.)

<sup>2</sup> Hanoi Industrial Textile Garment University, Le Chi, Gia Lam, Hanoi, 100803, Viet Nam

\* Correspondence: khanh.vuthihong@hust.edu.vn ; Tel.: +84-9034-463-18

Received: 04 June 2020; Accepted: 10 July 2020; Published: date

## Appendix

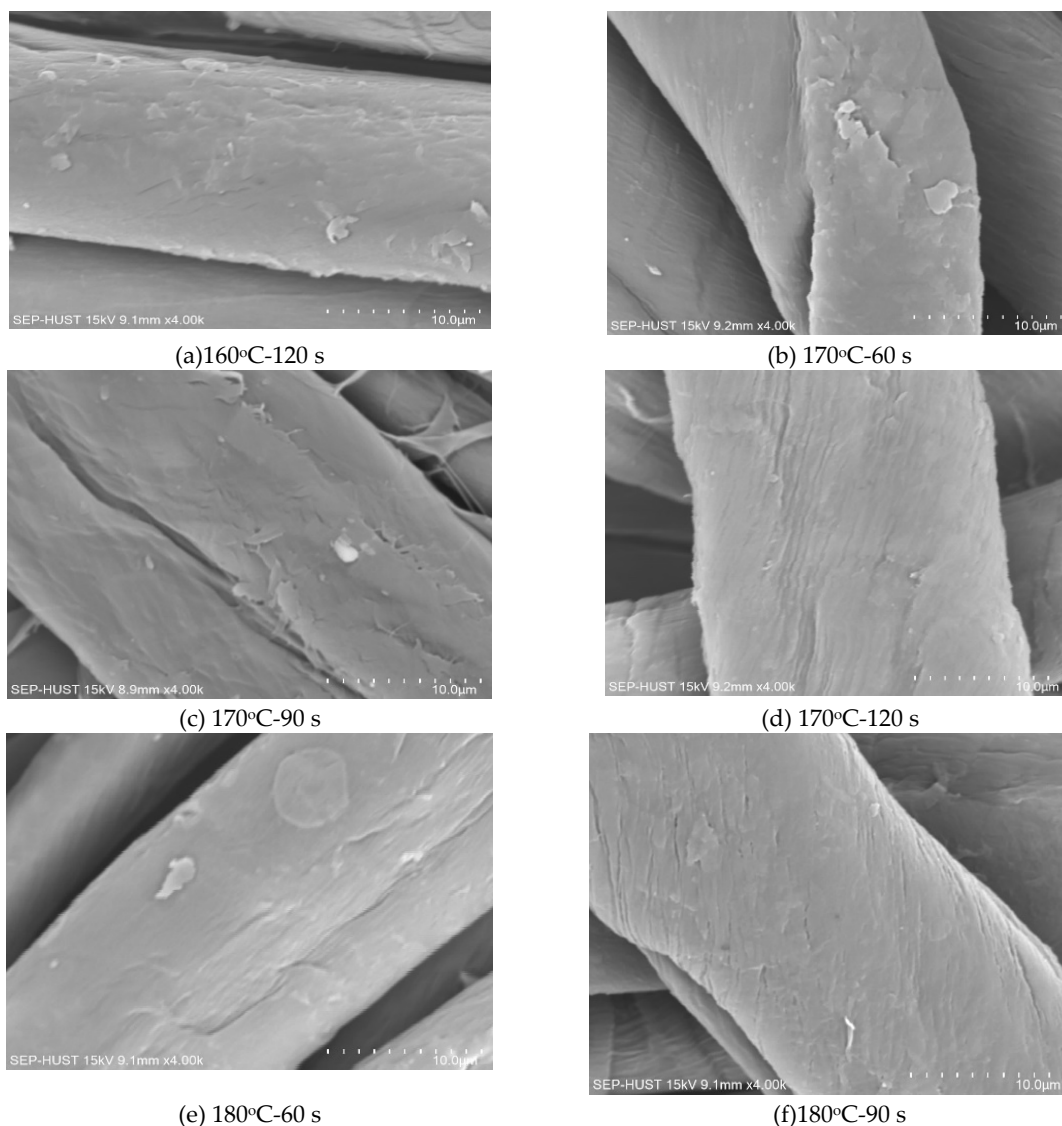

**Figure A1.** SEM images of the samples cured at different curing condition (curing temperature (°C) – curing time (s)) at a magnification of 4000×

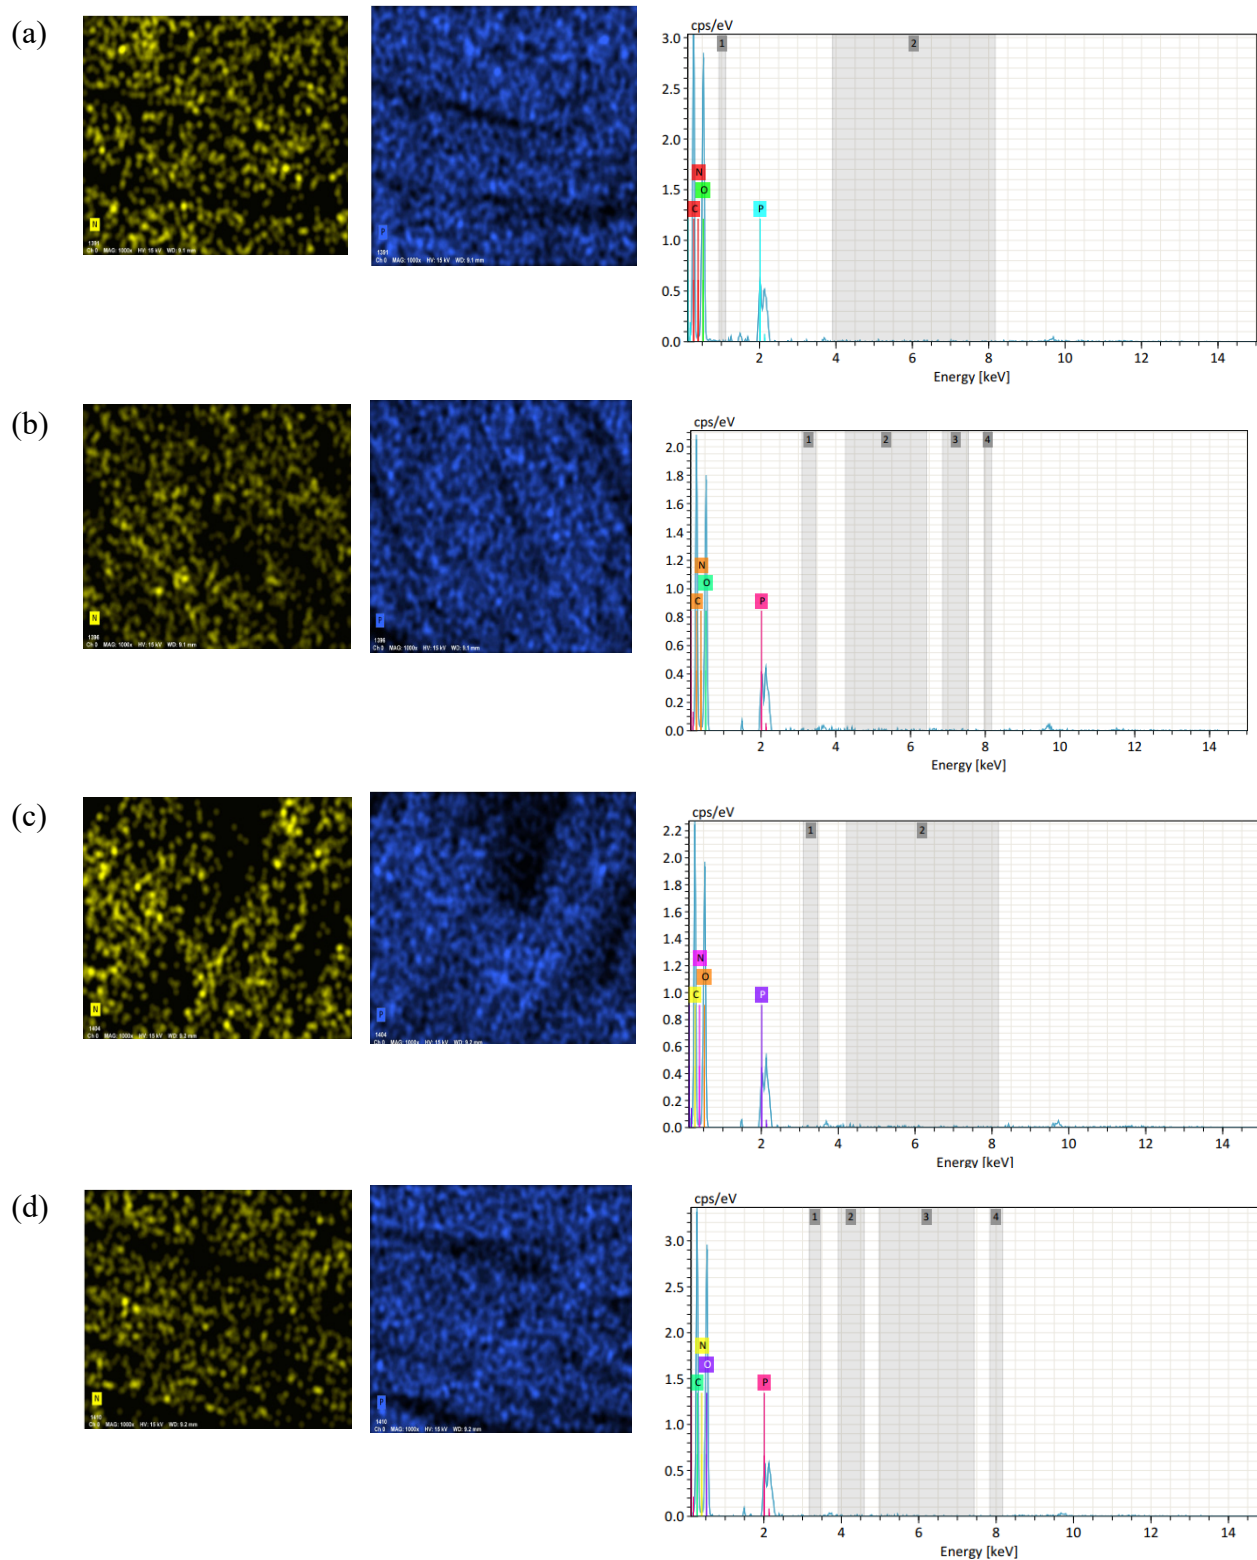

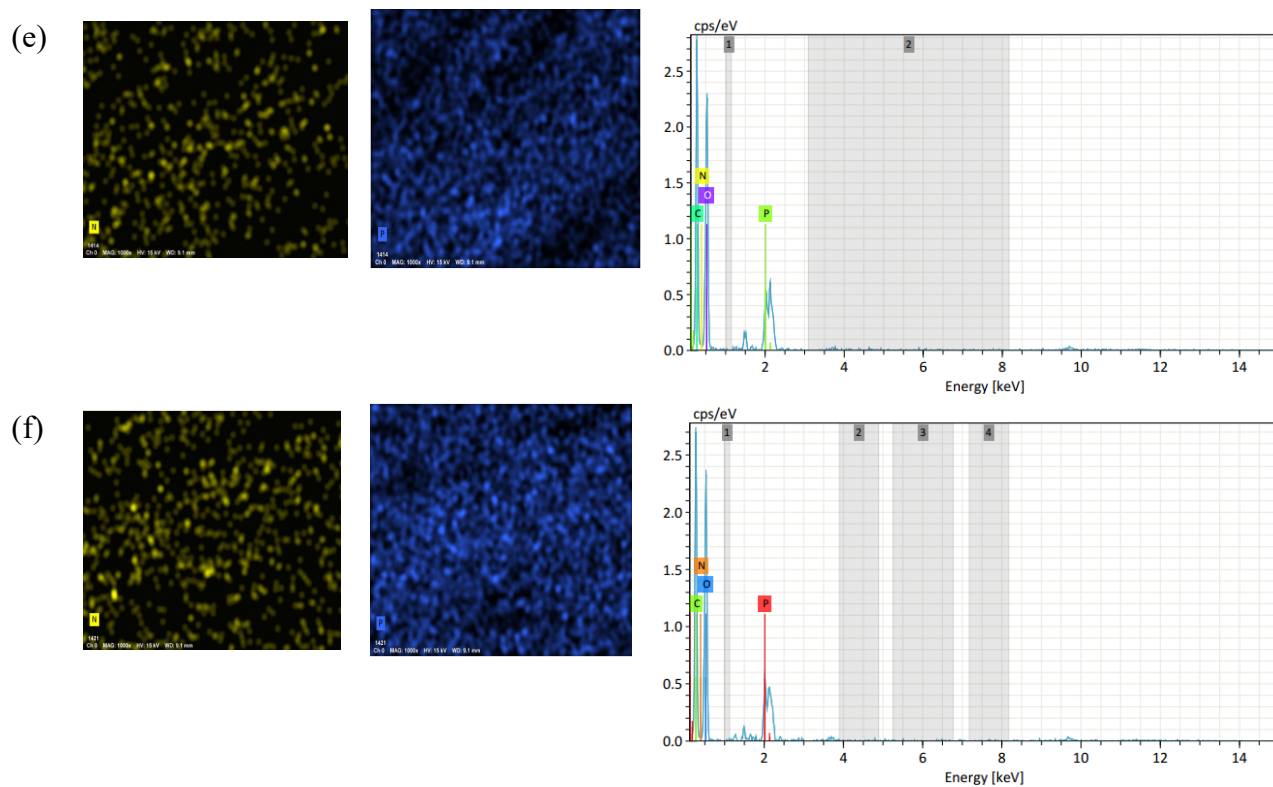

**Figure A2.** EDX N, P mapping and elemental spectral profile of (a) cured at 160°C for 120 s; (b) cured at 170°C for 60 s; (c) cured at 170°C for 90 s; (d) cured at 170°C for 120 s; (e) cured at 180°C for 60 s; (f) cured at 180°C for 90 s

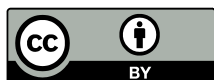

© 2018 by the authors. Submitted for possible open access publication under the terms and conditions of the Creative Commons Attribution (CC BY) license (<http://creativecommons.org/licenses/by/4.0/>).
